# Supplementary material for: Efficient and stable N-heterocyclic ketone–Cu complex catalysts for acetylene hydrochlorination: the promotion effect of ligands revealed from DFT calculations
Source: Royal Society of Chemistry journal article supplement (doi:10.1039/d3cp02514d), 2023-01-01
Supplement: d3cp02514d1.pdf [file d3cp02514d1.pdf]

## Electronic Supplementary Information

### **Efficient and stable N-heterocyclic ketone-Cu complex catalysts for acetylene hydrochlorination: Promotion effect of ligands revealed by DFT calculation**

Yilin Zhang, Sen Li, Xianliang Qiao, Qingxin Guan<sup>\*</sup>, and Wei Li<sup>\*</sup>

*College of Chemistry, State Key Laboratory of Elemento-Organic Chemistry, Key Laboratory of Advanced Energy Materials Chemistry (Ministry of Education), Nankai University, No. 94 Weijin Road, Tianjin 300071, P. R. China.*

Corresponding Authors:

Email: qingxinguan@nankai.edu.cn (Q. Guan)

Email: weili@nankai.edu.cn (W. Li)

**Table S1.** Surface Cu Components of Catalysts (XPS Cu 2p)

| Catalyst                            | Area Cu <sup>2+</sup> (%) | Area Cu <sup>+</sup> (%) | Area Cu <sup>0</sup> (%) |
|-------------------------------------|---------------------------|--------------------------|--------------------------|
| 20%CuCl <sub>2</sub> -fresh         | 52.5                      | 43.7                     | 3.7                      |
| 20%CuCl <sub>2</sub> -used          | 34.9                      | 60.4                     | 4.7                      |
| 20%CuCl <sub>2</sub> -10%2P-fresh   | 90.5                      | 8.7                      | 0.8                      |
| 20%CuCl <sub>2</sub> -10%2P-used    | 86.6                      | 12.1                     | 1.3                      |
| 20%CuCl <sub>2</sub> -10%NM2P-fresh | 93.2                      | 6.4                      | 0.4                      |
| 20%CuCl <sub>2</sub> -10%NM2P-used  | 91.1                      | 8.5                      | 0.3                      |

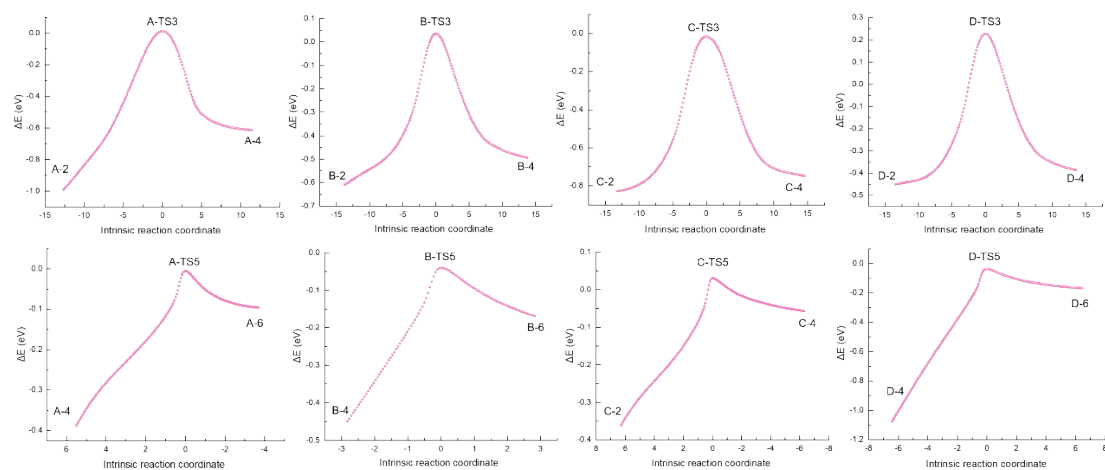

**Figure S1.** Intrinsic reaction coordinate (IRC) for TS3 and TS5 of acetylene hydrochlorination over the CuCl/AC site, CuCl<sub>2</sub>-NM2P/AC site, CuCl<sub>2</sub>-2P/AC site, and CuCl<sub>2</sub>/AC site.

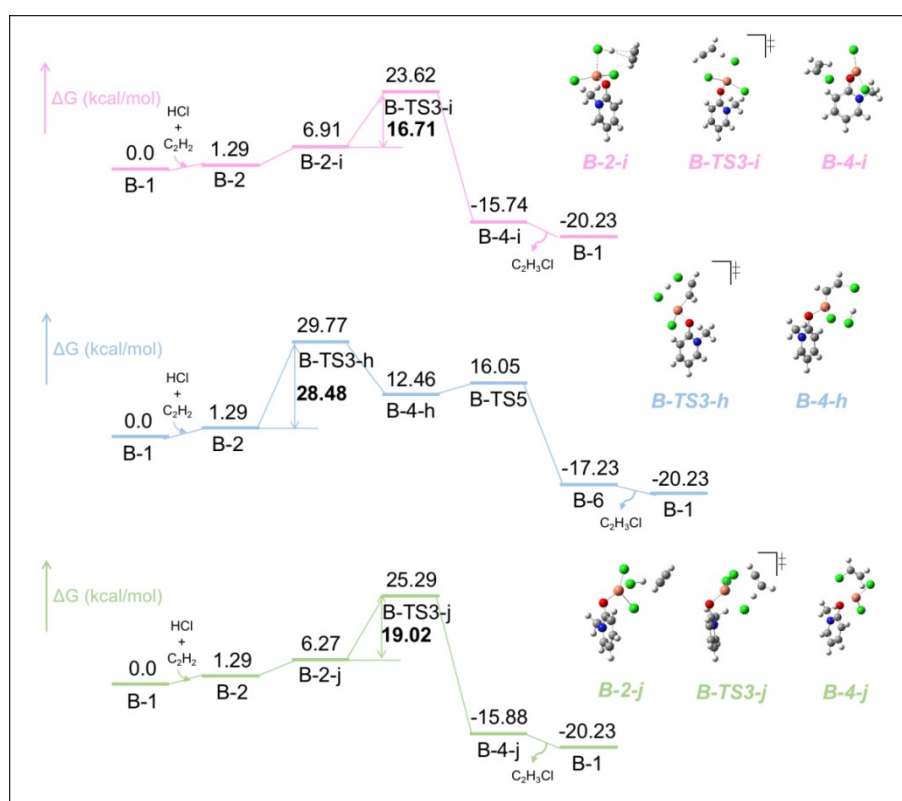

**Figure S2.** Energy profiles of acetylene hydrochlorination of HCl and C<sub>2</sub>H<sub>2</sub> with the CuCl<sub>2</sub>-NM2P/AC catalyst along other possible pathways.

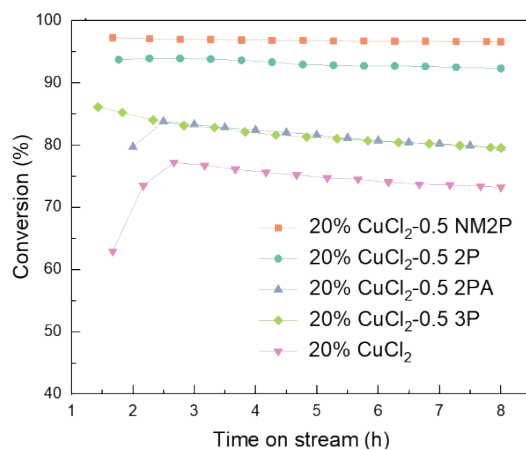

**Figure S3.** Acetylene conversion in acetylene hydrochlorination over different catalysts including CuCl<sub>2</sub>-0.5 NM2P/AC, CuCl<sub>2</sub>-0.5 2P/AC, CuCl<sub>2</sub>-0.5 2PA/AC, CuCl<sub>2</sub>-0.5 3P/AC and CuCl<sub>2</sub>/AC. Reaction conditions: T = 180 °C, GHSV(C<sub>2</sub>H<sub>2</sub>) = 160 h<sup>-1</sup>, V(HCl)/V(C<sub>2</sub>H<sub>2</sub>) = 1.2.

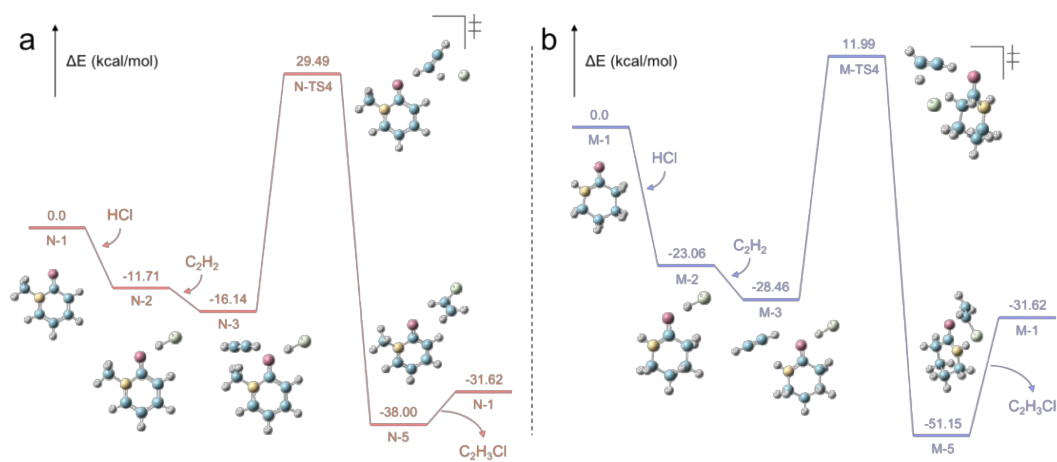

**Figure S4.** Energy profile of acetylene hydrochlorination of HCl and C<sub>2</sub>H<sub>2</sub> with the N-methyl-2-pyridone or 2-piperidone catalyst.

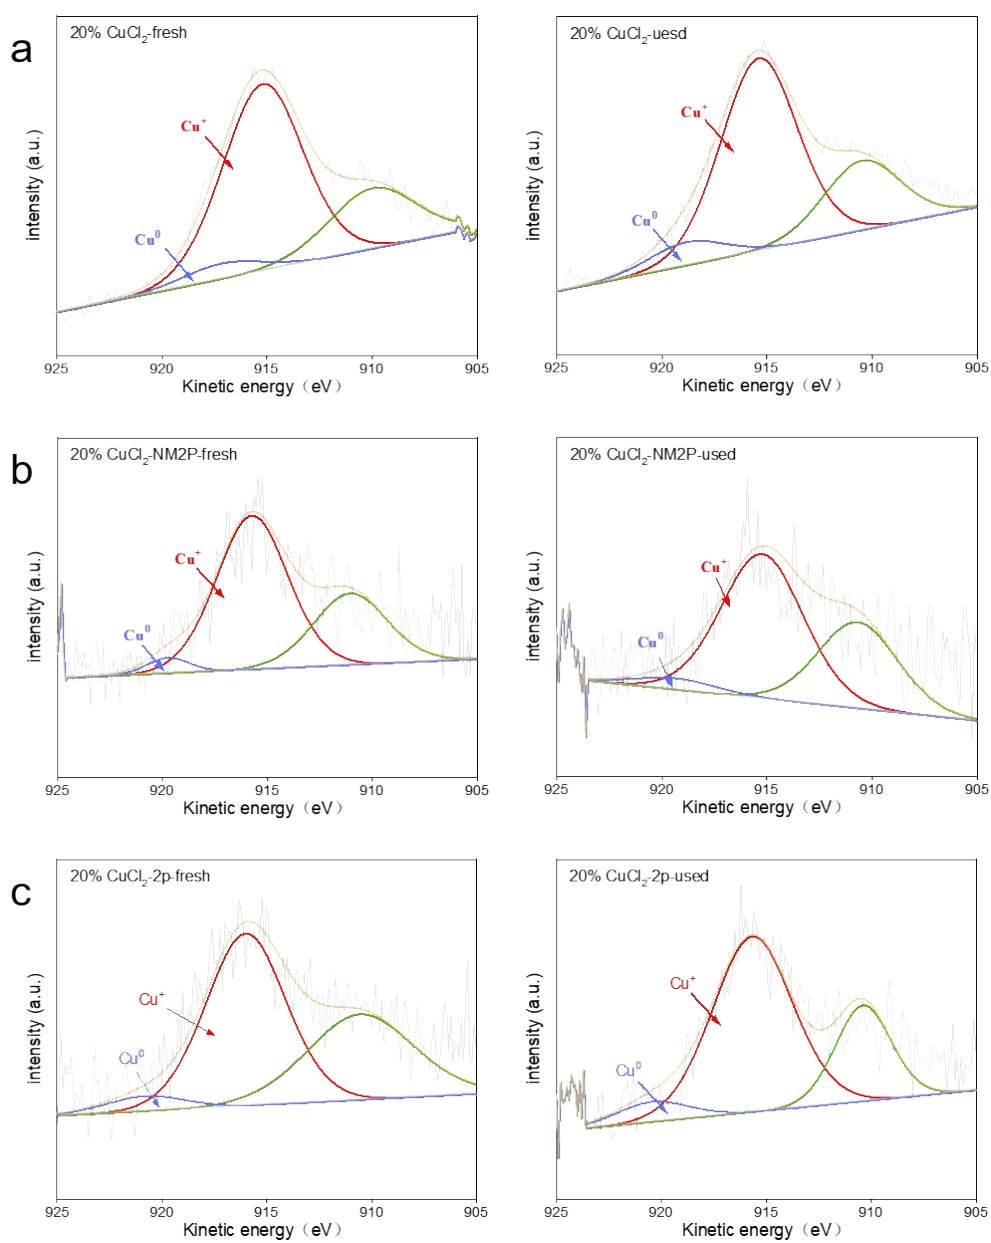

**Figure S5.** Cu LMM Auger spectra of fresh catalysts and used catalysts (a) CuCl<sub>2</sub>/AC, (b) CuCl<sub>2</sub>-NM2P/AC and (c) CuCl<sub>2</sub>-2P/AC.

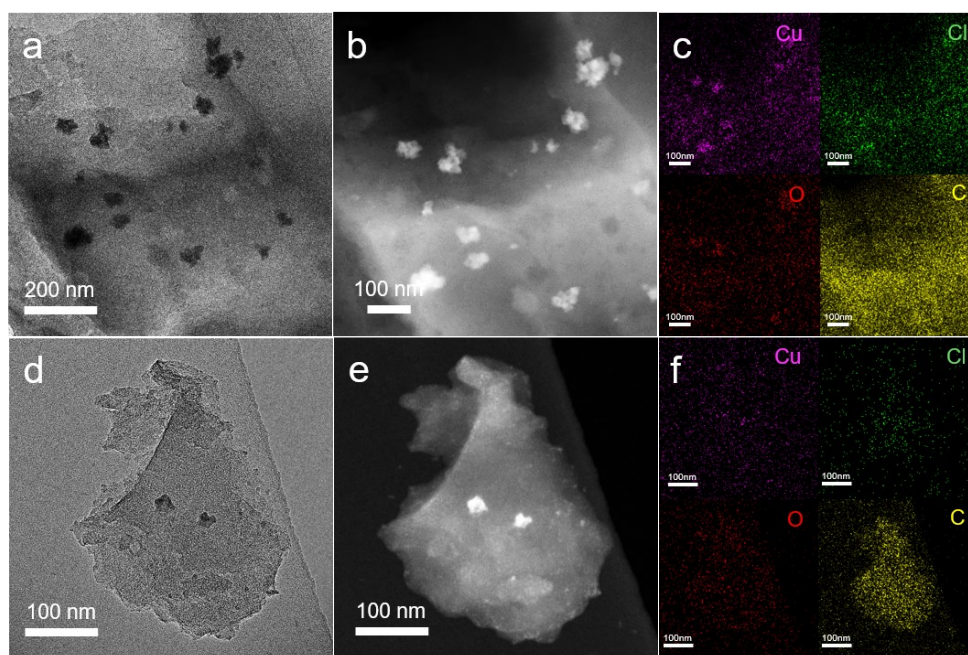

**Figure S6.** TEM images of used catalysts: (a) 20%CuCl<sub>2</sub>/AC, (d) 20%CuCl<sub>2</sub>-NM2P/AC, and HAADF-STEM image of used catalysts: (b) 20%CuCl<sub>2</sub>/AC, (e) 20%CuCl<sub>2</sub>-NM2P/AC, and EDS elemental maps of used catalysts: (c) 20%CuCl<sub>2</sub>/AC, (f) 20%CuCl<sub>2</sub>-NM2P/AC.

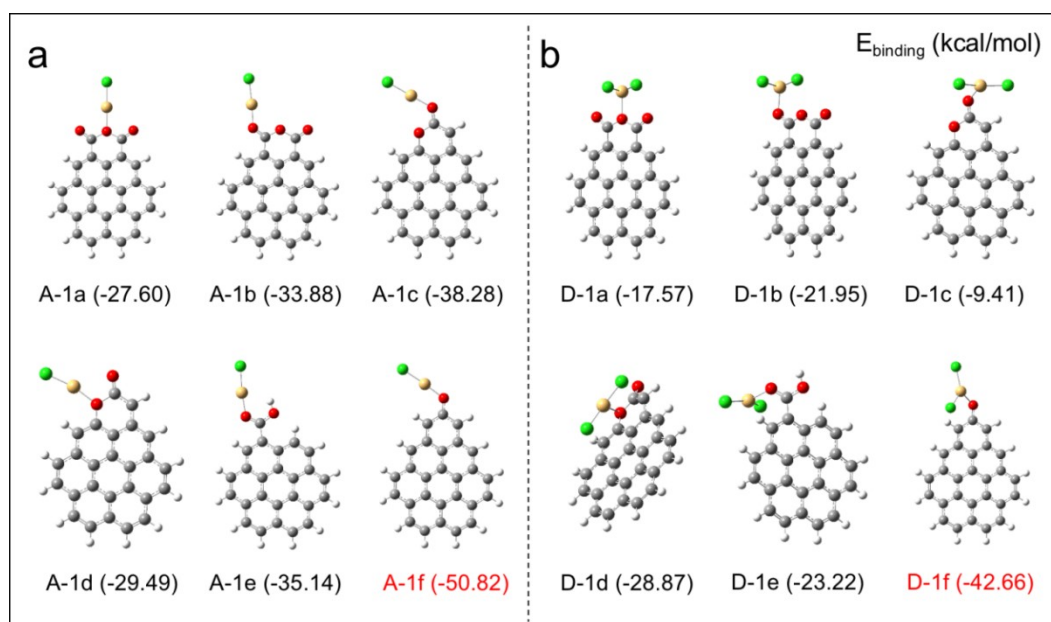

**Figure S7.** Optimized geometries of A-1n Cu(I)/AC and D-1n Cu(II)/AC.

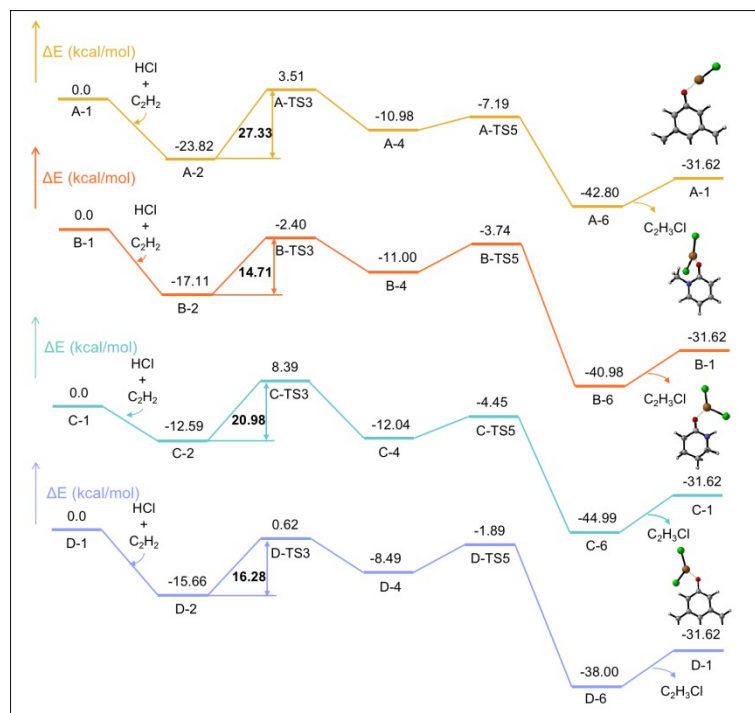

**Figure S8.** DFT calculations on the reaction mechanism. The system energy profile of the acetylene hydrochlorination of HCl and C<sub>2</sub>H<sub>2</sub> with the catalysts CuCl/AC, CuCl<sub>2</sub>-NM2P/AC, CuCl<sub>2</sub>-2P/AC and CuCl<sub>2</sub>/AC.

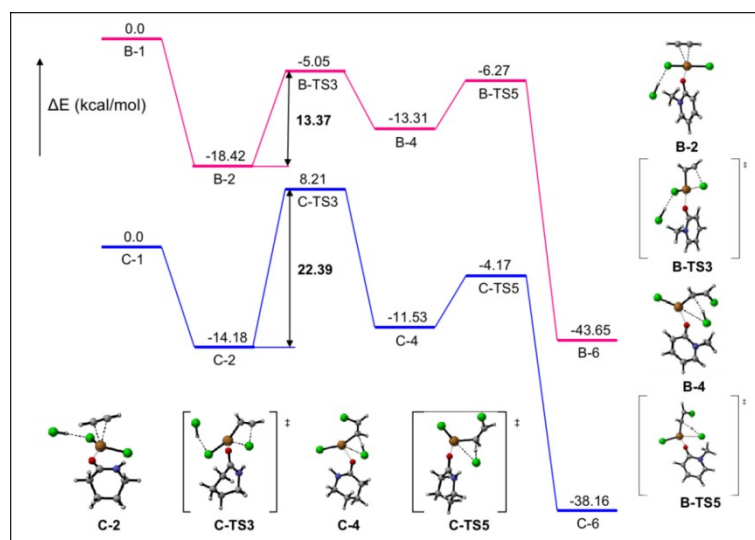

**Figure S9.** DFT calculations on the reaction mechanism using the M06 method. Energy profile of the acetylene hydrochlorination of HCl and C<sub>2</sub>H<sub>2</sub> with the catalysts CuCl<sub>2</sub>-NM2P/AC and CuCl<sub>2</sub>-2P/AC and optimized geometries of intermediates and transition

states.

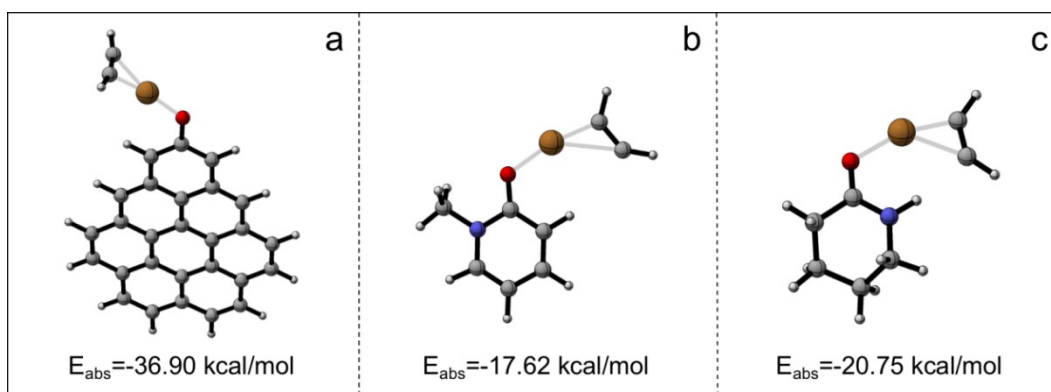

**Figure S10.** Adsorption configurations and energies of  $C_2H_2$  and  $HCl$  on  $Cu^0$  complexes.

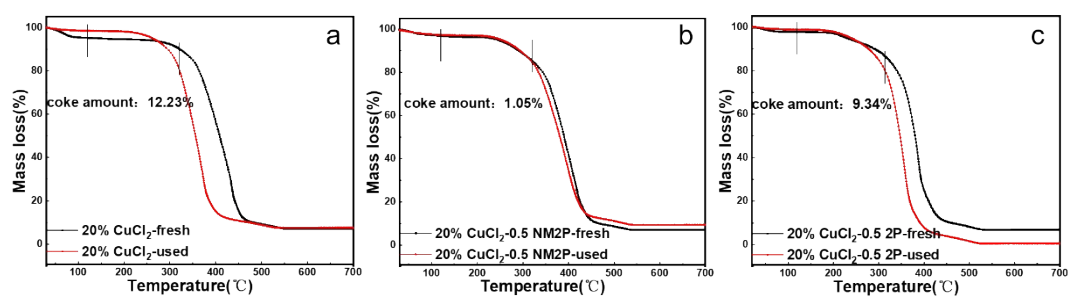

**Figure S11.** TGA curves of fresh and used catalysts (a)  $CuCl_2/AC$  and (b)  $CuCl_2$ -NM2P/AC and (c)  $CuCl_2$ -2P/AC.
